# Supplementary material
Source: PubMed Central journal article supplement (PMC5679354)

No treatment

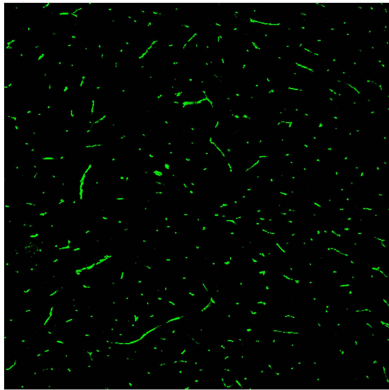

Isotype

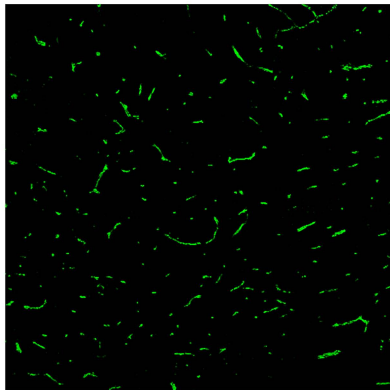

Anti-Jagged

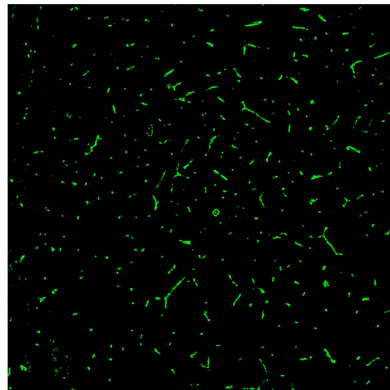

10X

Supplement: NIHMS903226-supplement-2.pdf [file NIHMS903226-supplement-2.pdf]

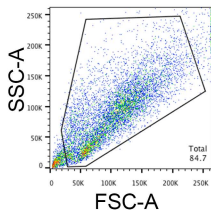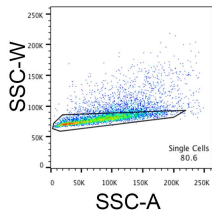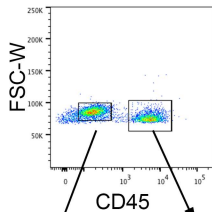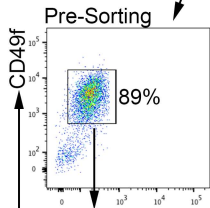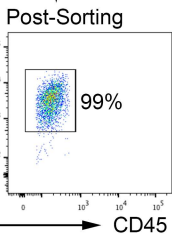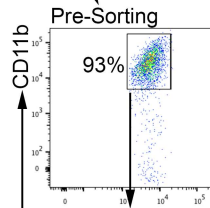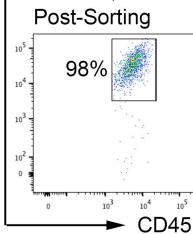

Supplement: NIHMS903226-supplement-3.pdf [file NIHMS903226-supplement-3.pdf]

Suppl. Fig. 3. Sierra, et al.

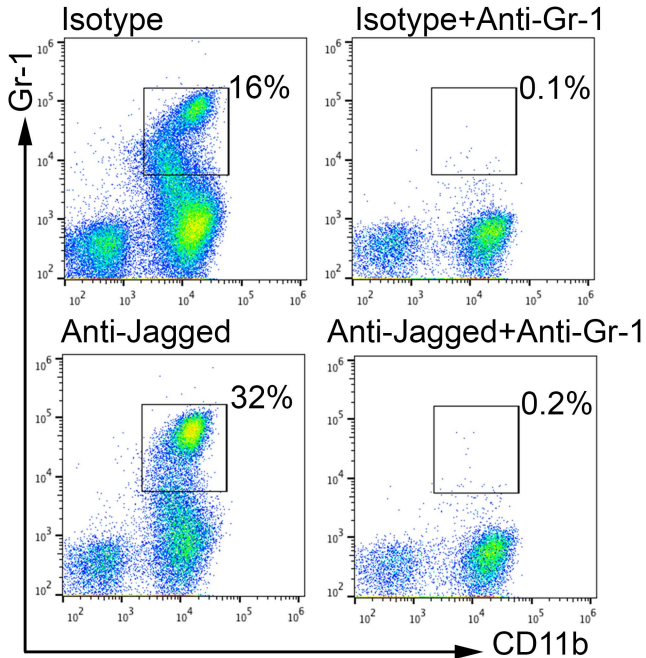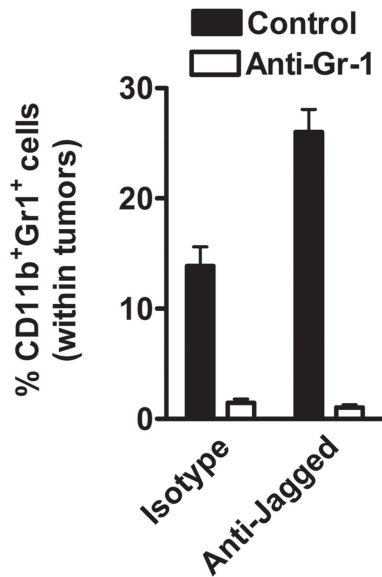

Supplement: NIHMS903226-supplement-4.pdf [file NIHMS903226-supplement-4.pdf]

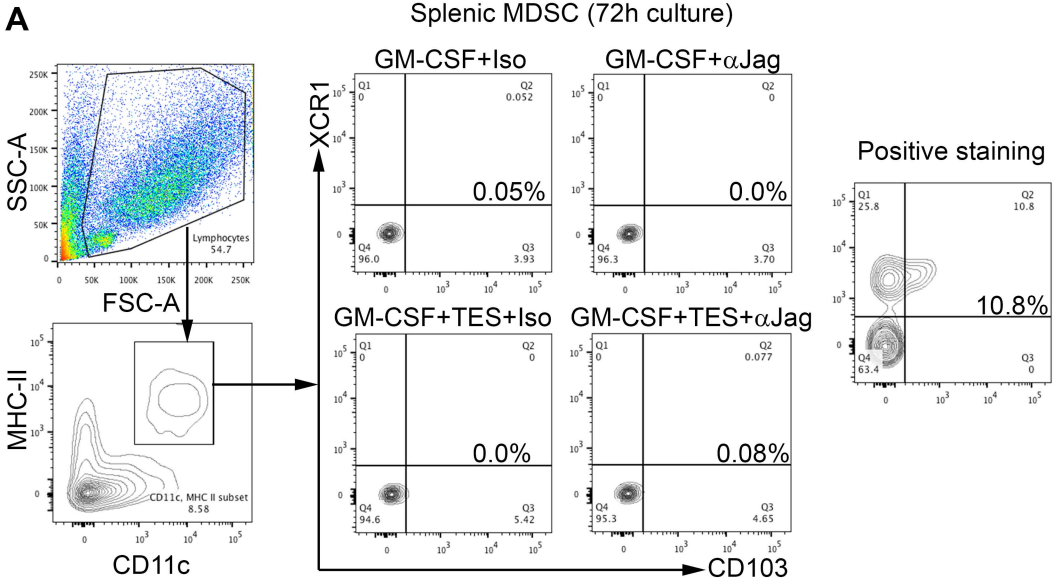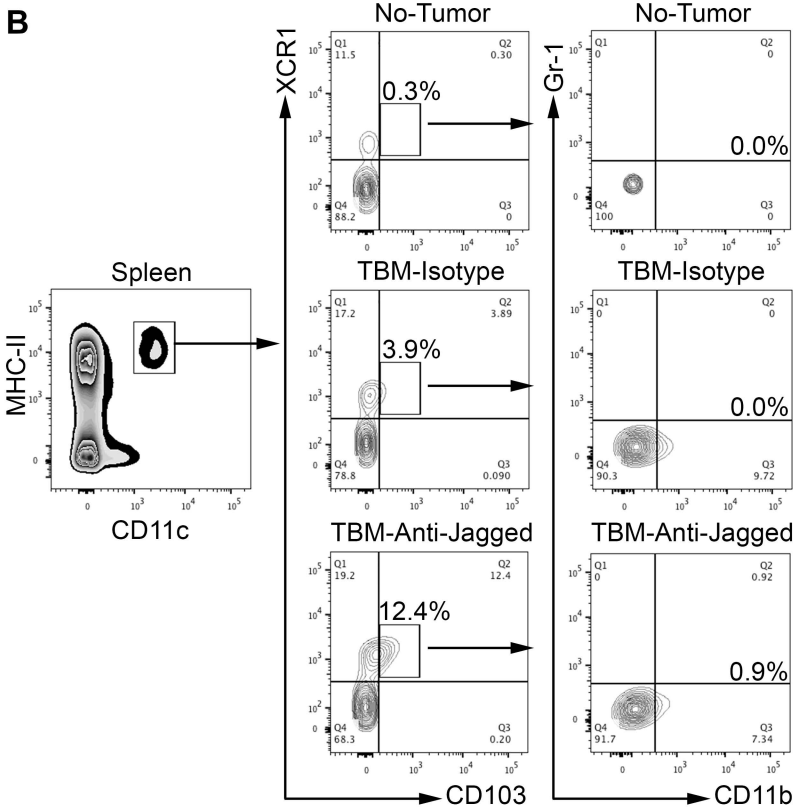

Supplement: NIHMS903226-supplement-5.pdf [file NIHMS903226-supplement-5.pdf]

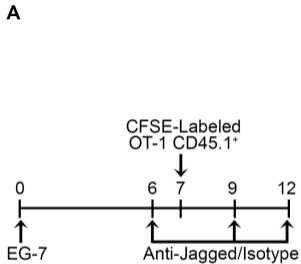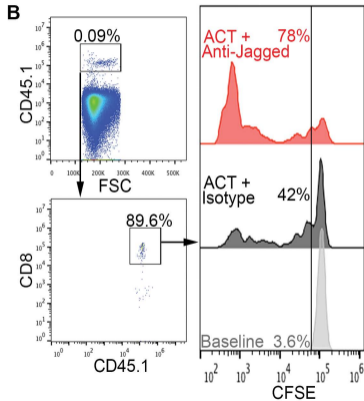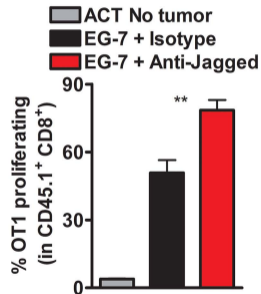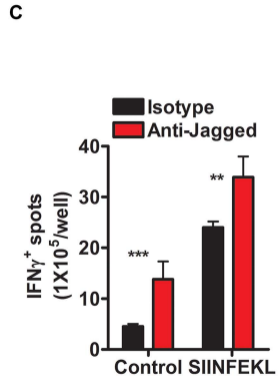

Supplement: NIHMS903226-supplement-6.pdf [file NIHMS903226-supplement-6.pdf]

Suppl. Fig. 6. Sierra, et al.

**A**

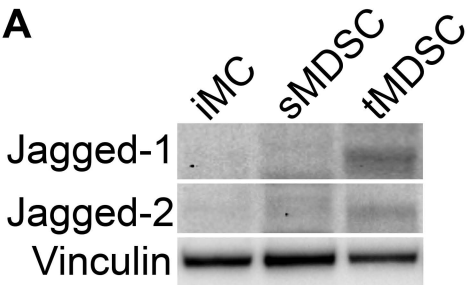

**B**

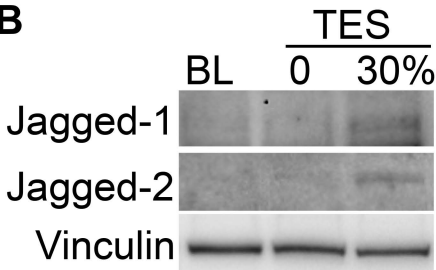

Supplement: NIHMS903226-supplement-7.pdf [file NIHMS903226-supplement-7.pdf]
